# Supplementary material for: Transplant Renal Artery Stenosis
Source: PubMed Central journal article supplement — Kidney Int Rep. 2020 Oct 8;5(12):2399–402. doi: 10.1016/j.ekir.2020.09.041 (PMC7710822; doi:10.1016/j.ekir.2020.09.041), 2020-10-08
Supplement: mmc1.pdf [file mmc1.pdf]

## Supplementary References

- S1. Goldblatt H, Lynch J, Hanzal RF, Summerville WW. STUDIES ON EXPERIMENTAL HYPERTENSION : I. THE PRODUCTION OF PERSISTENT ELEVATION OF SYSTOLIC BLOOD PRESSURE BY MEANS OF RENAL ISCHEMIA. *J Exp Med* 1934;**59**(3):347-79 doi: 10.1084/jem.59.3.347
- S2. Pouria S, State OI, Wong W, Hendry BM. CMV infection is associated with transplant renal artery stenosis. *Qjm* 1998;**91**(3):185-9 doi: 10.1093/qjmed/91.3.185.
- S3. Wong W, Fynn SP, Higgins RM, et al. Transplant renal artery stenosis in 77 patients--does it have an immunological cause? *Transplantation* 1996;**61**(2):215-9 doi: 10.1097/00007890-199601270-00009.
- S4. Bruno S, Remuzzi G, Ruggenti P. Transplant Renal Artery Stenosis. *Journal of the American Society of Nephrology* 2004;**15**(1):134-41 doi: 10.1097/01.Asn.0000099379.61001.F8[published Online First: Epub Date]].
